# Supplementary material for: Piloting a Parental Education Module on Early Developmental Milestones During Antenatal Visits: Assessment of Feasibility, Acceptability, and Preliminary Effectiveness.
Source: Research Square preprint supplement (doi:10.21203/rs.3.rs-6935679/v1), 2025-08-06
Supplement: Supplementary file 1 [file 76841ce15e1a1b4aa280ec4f.docx]

PRE AND POST TEST QUESTIONNAIRE

| **Serial No** | **Questions** | **Options** | **Correct answer** |
| --- | --- | --- | --- |
| 1 | By the end of the 3rd month, what should your baby be doing? | a. Smiling at people b. Sitting on their own c. Walking with support d. Speaking in full sentences | **a** |
| 2 | At what age does a baby start to respond to their name? | a. 10-12 months b. 4-6 months c. 7-9 months d. 2-3 months | **b** |
| 3 | Why is it important to track your baby's developmental milestones? | a. To make sure the baby is growing as expected and spot delays early b. To compare with other babies c. To follow cultural traditions d. To prepare for school admission | **a** |
| 4 | By the end of the 6th month, what should your baby be doing? | a. Smiling at people b. Engaging with a mirror c. Walking with support d. Speaking in full sentences | **b** |
| 5 | Around 6 months, what can your baby typically do? | a. Crawling b. Sitting without support c. Keeping both hands on the chest d. Social smiling | **a** |
| 6 | At what month you will be concern, if your baby is not rolled over from back to tummy? | a. 3rd month b. 6th month c. 9th month d. 10th month | **b** |
| 7 | When will a baby typically go from lying down to sitting up? | a. 2-3 months b. 4-6 months c. 7-9 months d. 10-11 months | **d** |
| 8 | By the end of 12 months, what should your baby be doing? | a. Paying joint attention  b. Crawling on their tummy c. Making cooing sounds d. Speaking in full sentences | **a** |
| 9 | At what age will your baby start using both hands to hit objects and play? | a. 4 -6 months b. 10-12 months c. 7-9 months d. 2-3 months | **b** |
| 10 | What activity will your baby do at 7-9 months that will help with future tasks like writing and eating? | a. Drinking water from a cup b. Starting to walk c. Passing a toy between hands d. Playing with others | **c** |
